# Supplementary material for: Preparation and properties of novel (Tb1−xCex)3Sc2Al3O12 magneto-optical transparent ceramics with different doping concentrations
Source: Royal Society of Chemistry journal article supplement (doi:10.1039/d3ce00233k), 2023-01-01
Supplement: d3ce00233k1.pdf [file d3ce00233k1.pdf]

## Supporting Information

### Preparation and properties of novel $(\text{Tb}_{1-x}\text{Ce}_x)\text{Sc}_2\text{Al}_3\text{O}_{12}$ magneto-optical ceramics with different doping concentrations

Fang Wang<sup>a,b</sup>, Yiheng Wu<sup>b,d</sup>, Xieming Xu<sup>b,d</sup>, Rui Zhang<sup>a,b</sup>, Qi Luo<sup>a,b</sup>, Hao Lu<sup>b,d</sup>,  
Shuaihua Wang<sup>\*b,c</sup>, Shaofan Wu<sup>\*b,c</sup>

<sup>a</sup>*College of Chemistry and Materials Science, Fujian Normal University, Fuzhou,  
Fujian 350117, China.*

<sup>b</sup>*Key Laboratory of Optoelectronic Materials Chemistry and Physics, Fujian Institute  
of Research on the Structure of Matter, Chinese Academy of Sciences, Fuzhou 350002,  
China.*

<sup>c</sup>*Fujian Science & Technology Innovation Laboratory for Optoelectronic Information  
of China, Fuzhou, Fujian 350108, China.*

<sup>d</sup>*University of Chinese Academy of Sciences, Beijing 100039, China.*

\* E-mail: shwang@fjirsm.ac.cn.

sfwu@fjirsm.ac.cn

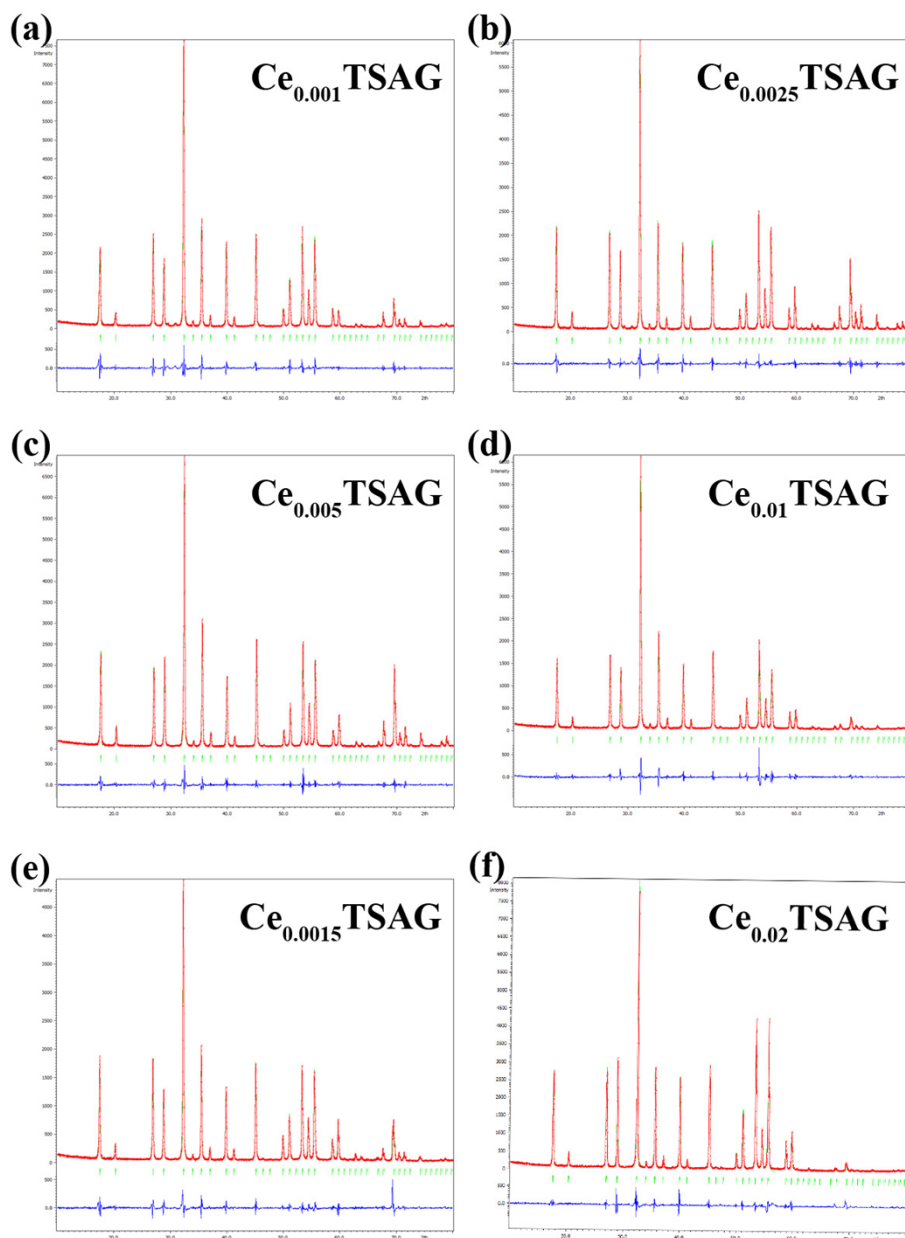

**Figure S1.** Rietveld refinement of  $(\text{Tb}_{1-x}\text{Ce}_x)_3\text{Sc}_2\text{Al}_3\text{O}_{12}$  ceramics. (a)  $\text{Ce}_{0.001}\text{TSAG}$ . (b)  $\text{Ce}_{0.0025}\text{TSAG}$ . (c)  $\text{Ce}_{0.005}\text{TSAG}$ . (d)  $\text{Ce}_{0.01}\text{TSAG}$ . (e)  $\text{Ce}_{0.0015}\text{TSAG}$ . (f)  $\text{Ce}_{0.02}\text{TSAG}$ .

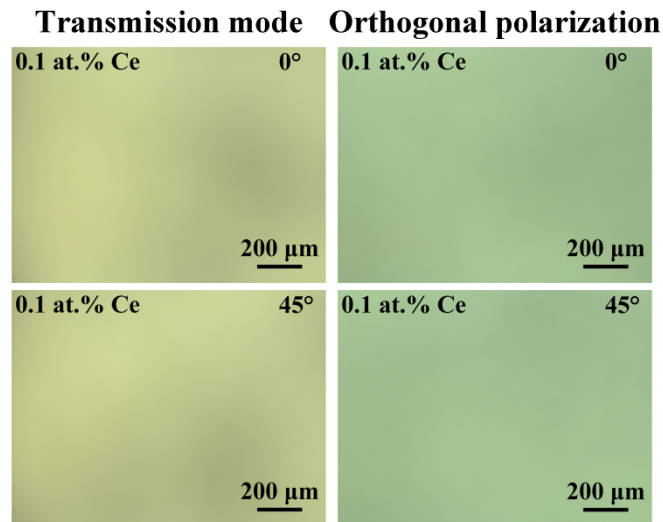

**Figure S2.** Transmission polarized optical microscopic images of the  $\text{Ce}_{0.001}\text{TSAG}$  ceramic (The image below shows the optical micrograph of the sample after 45° rotation relative to the image above).

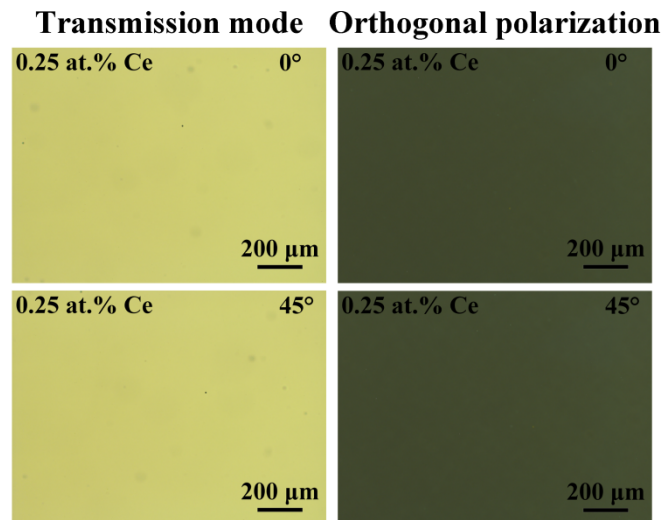

**Figure S3.** Transmission polarized optical microscopic images of the  $\text{Ce}_{0.0025}\text{TSAG}$  ceramic (The image below shows the optical micrograph of the sample after 45° rotation relative to the image above).

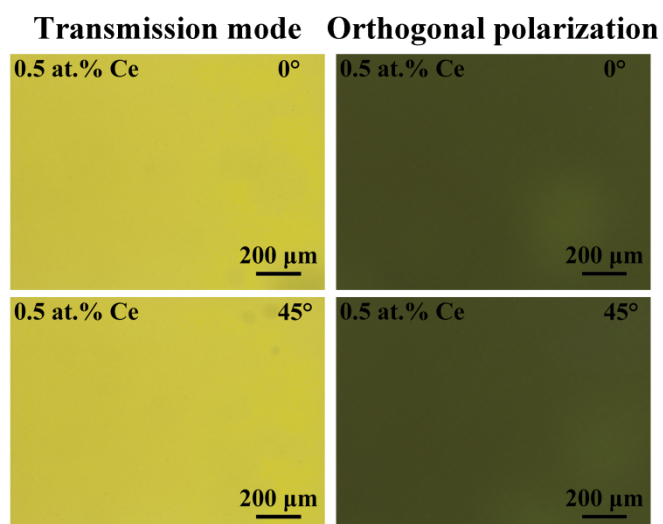

**Figure S4.** Transmission polarized optical microscopic images of the  $\text{Ce}_{0.005}\text{TSAG}$  ceramic (The image below shows the optical micrograph of the sample after  $45^\circ$  rotation relative to the image above).

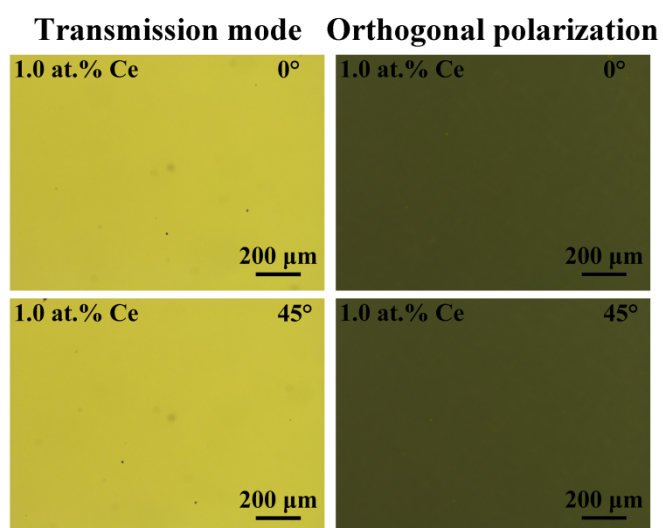

**Figure S5.** Transmission polarized optical microscopic images of the  $\text{Ce}_{0.01}\text{TSAG}$  ceramic (The image below shows the optical micrograph of the sample after  $45^\circ$  rotation relative to the image above).



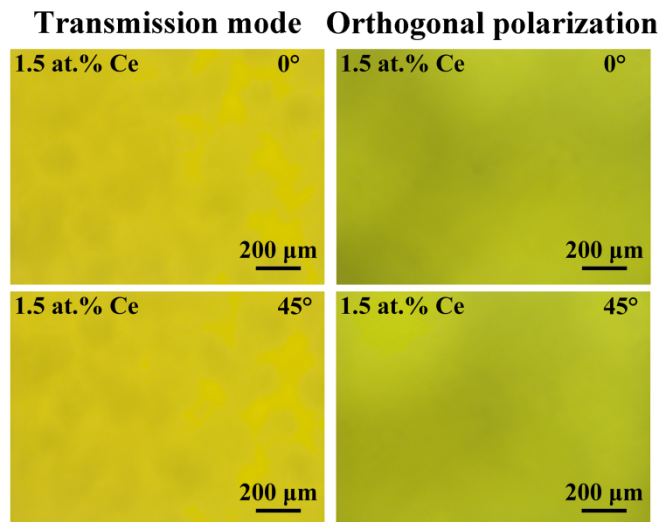

**Figure S6.** Transmission polarized optical microscopic images of the  $\text{Ce}_{0.015}\text{TSAG}$  ceramic (The image below shows the optical micrograph of the sample after 45° rotation relative to the image above).

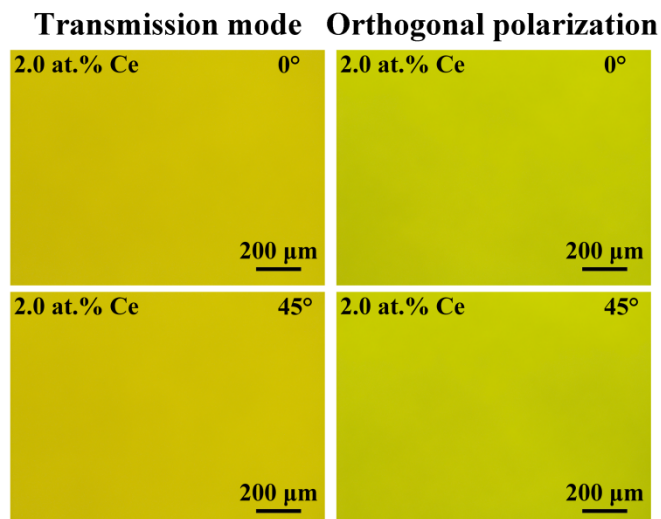

**Figure S7.** Transmission polarized optical microscopic images of the  $\text{Ce}_{0.02}\text{TSAG}$  ceramic (The image below shows the optical micrograph of the sample after 45° rotation relative to the image above).

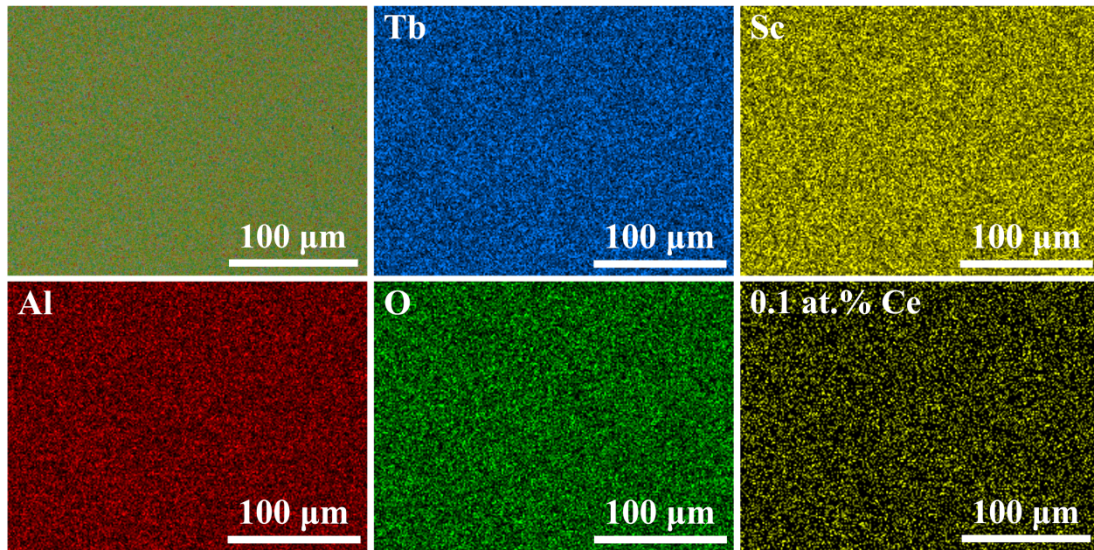

**Figure S8.** SEM image and EDS mapping results of the  $\text{Ce}_{0.001}\text{TSAG}$  ceramic.

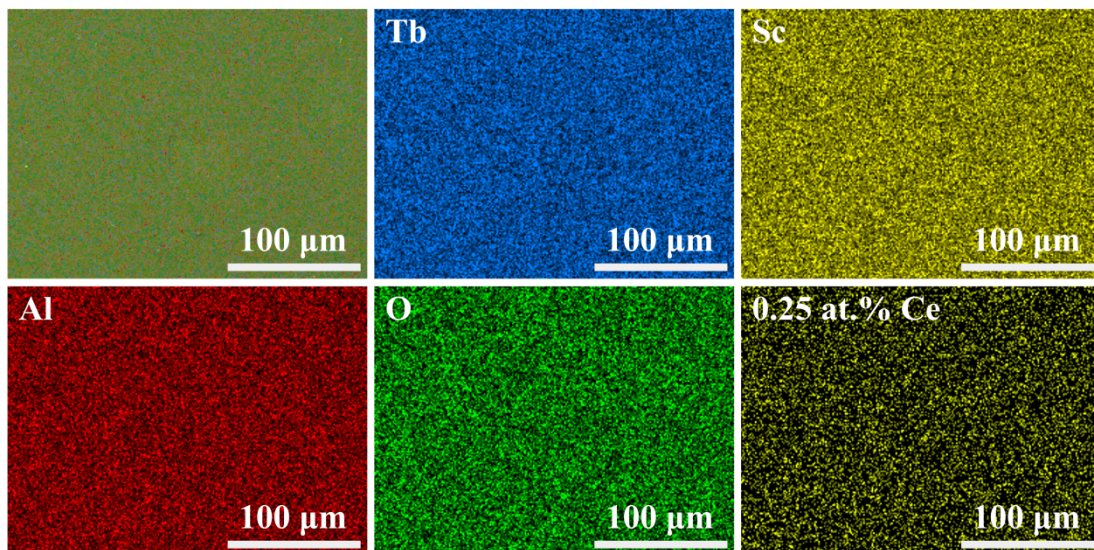

**Figure S9.** SEM image and EDS mapping results of the  $\text{Ce}_{0.0025}\text{TSAG}$  ceramic.

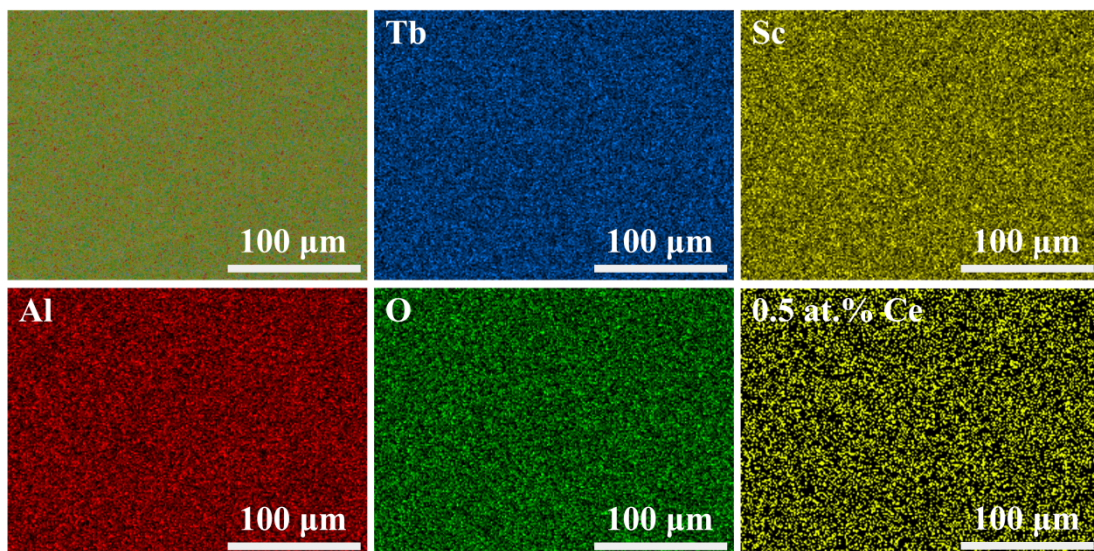



**Figure S10.** SEM image and EDS mapping results of the  $\text{Ce}_{0.005}\text{TSAG}$  ceramic.

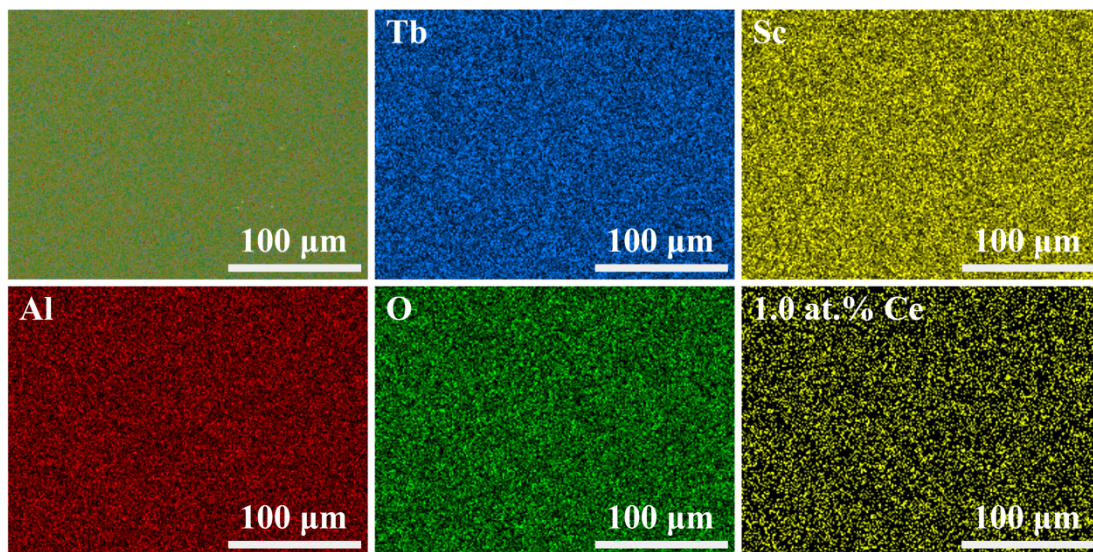

**Figure S11.** SEM image and EDS mapping results of the  $\text{Ce}_{0.01}\text{TSAG}$  ceramic.

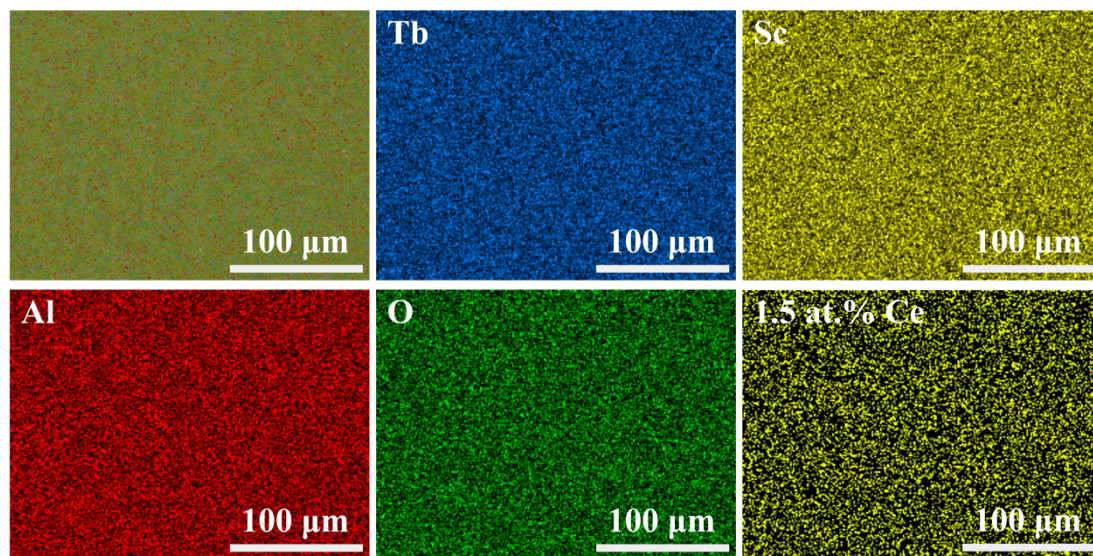

**Figure S12.** SEM image and EDS mapping results of the  $\text{Ce}_{0.015}\text{TSAG}$  ceramic.

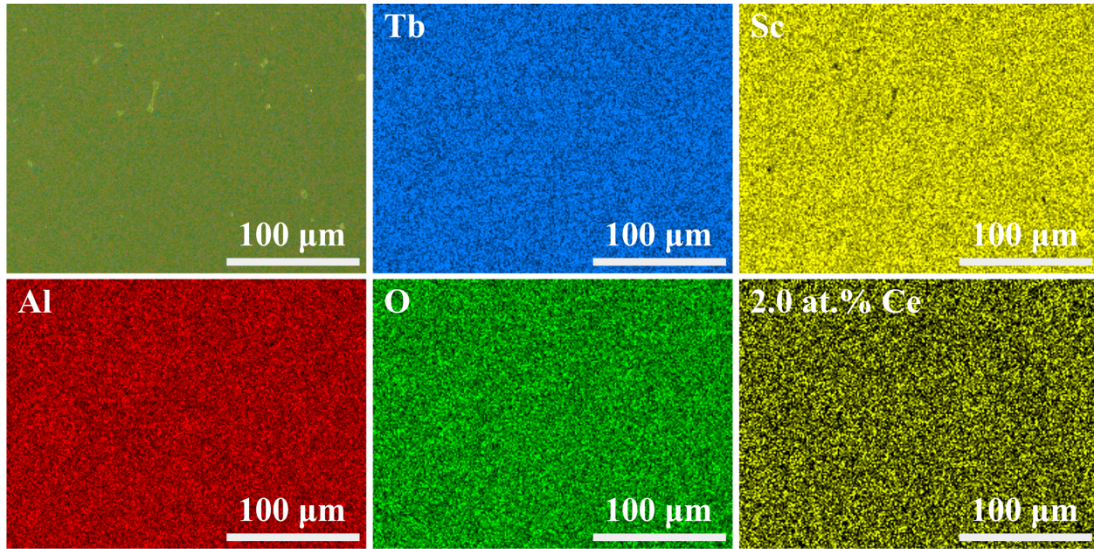

**Figure S13.** SEM image and EDS mapping results of the  $\text{Ce}_{0.02}\text{TSAG}$  ceramic.

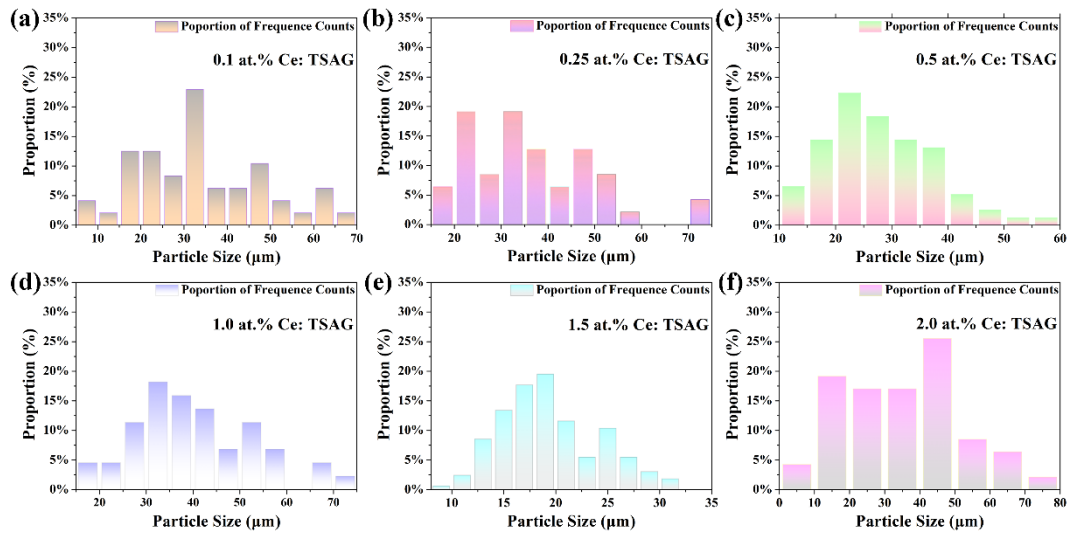

**Figure S14.** Particle size distribution diagram of (a)  $\text{Ce}_{0.001}\text{TSAG}$  ceramic, (b)  $\text{Ce}_{0.0025}\text{TSAG}$  ceramic, (c)  $\text{Ce}_{0.005}\text{TSAG}$  ceramic, (d)  $\text{Ce}_{0.01}\text{TSAG}$  ceramic, (e)  $\text{Ce}_{0.015}\text{TSAG}$  ceramic, (f)  $\text{Ce}_{0.02}\text{TSAG}$  ceramic. (The units of particle size are  $\mu\text{m}$ )



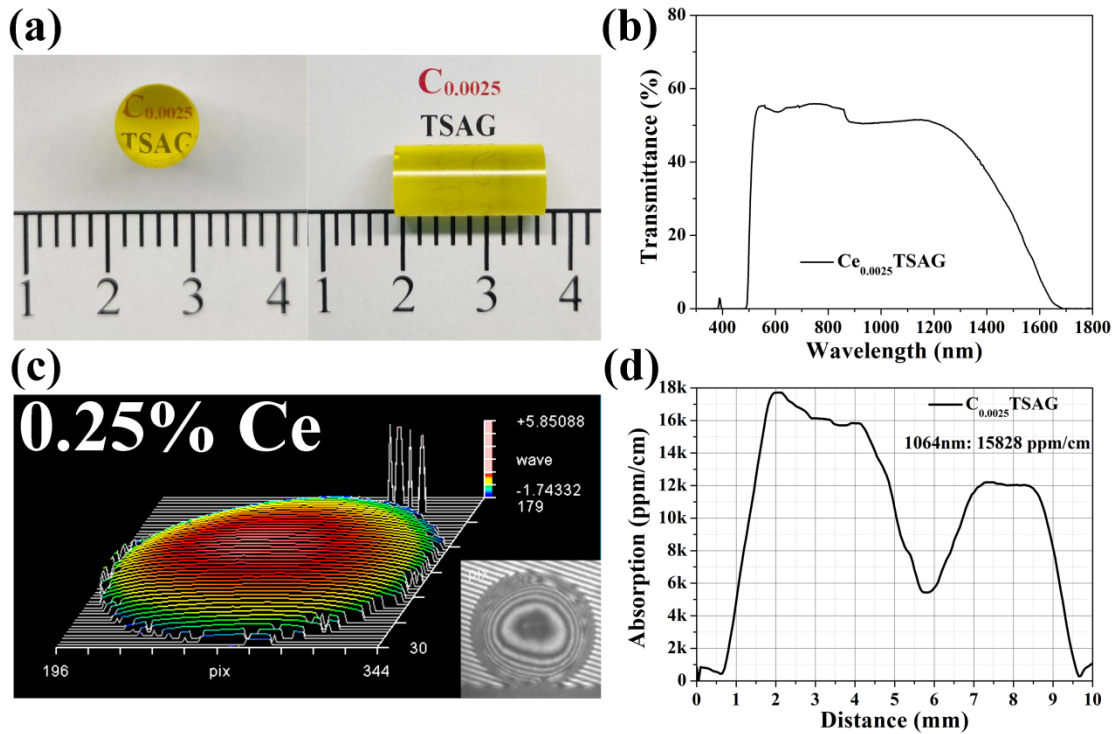

**Figure S15.** (a) Photograph of the  $\text{Ce}_{0.0025}\text{TSAG}$  ceramic ( $\phi 10 \text{ mm} \times 16 \text{ mm}$ ). (b) The optical transmittance spectra of the  $\text{Ce}_{0.0025}\text{TSAG}$  ceramic. (c) The wave-front intensity map and oblique plot of the  $\text{Ce}_{0.0025}\text{TSAG}$  ceramic. (d) The optical weak absorption diagram of the  $\text{Ce}_{0.0025}\text{TSAG}$  ceramic.

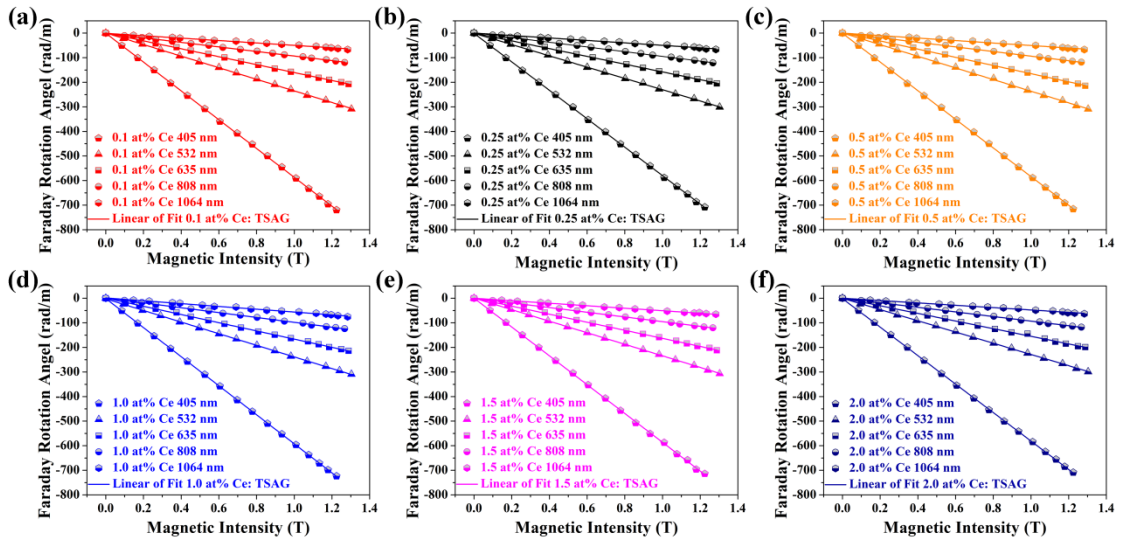

**Figure S16.** Faraday rotation of (a)  $\text{Ce}_{0.001}\text{TSAG}$  ceramic, (b)  $\text{Ce}_{0.0025}\text{TSAG}$  ceramic, (c)  $\text{Ce}_{0.005}\text{TSAG}$  ceramic, (d)  $\text{Ce}_{0.01}\text{TSAG}$  ceramic, (e)  $\text{Ce}_{0.015}\text{TSAG}$  ceramic in different wavelengths at room temperature.

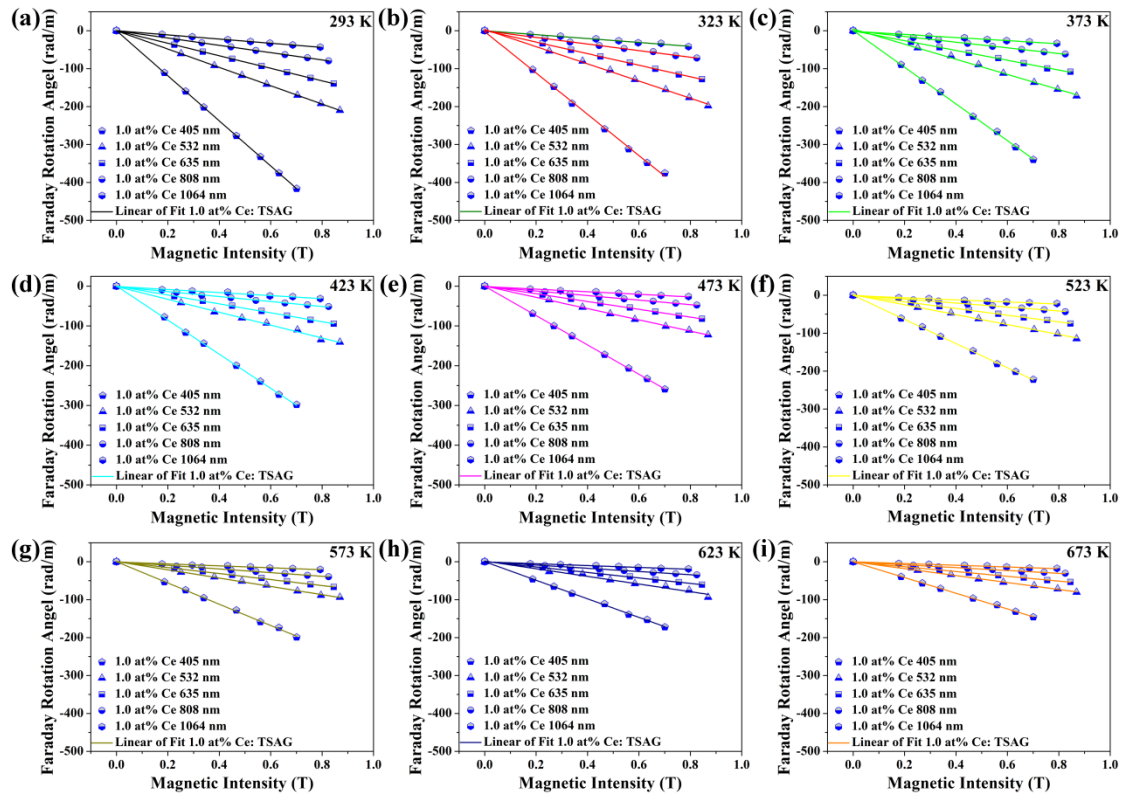

**Figure S17.** Faraday rotation of  $\text{Ce}_{0.01}$  TSAG in different wavelengths at (a) 293 K, (b) 323 K, (c) 373 K, (d) 423 K, (e) 473 K, (f) 523 K, (g) 573 K, (h) 623 K, (i) 673 K.

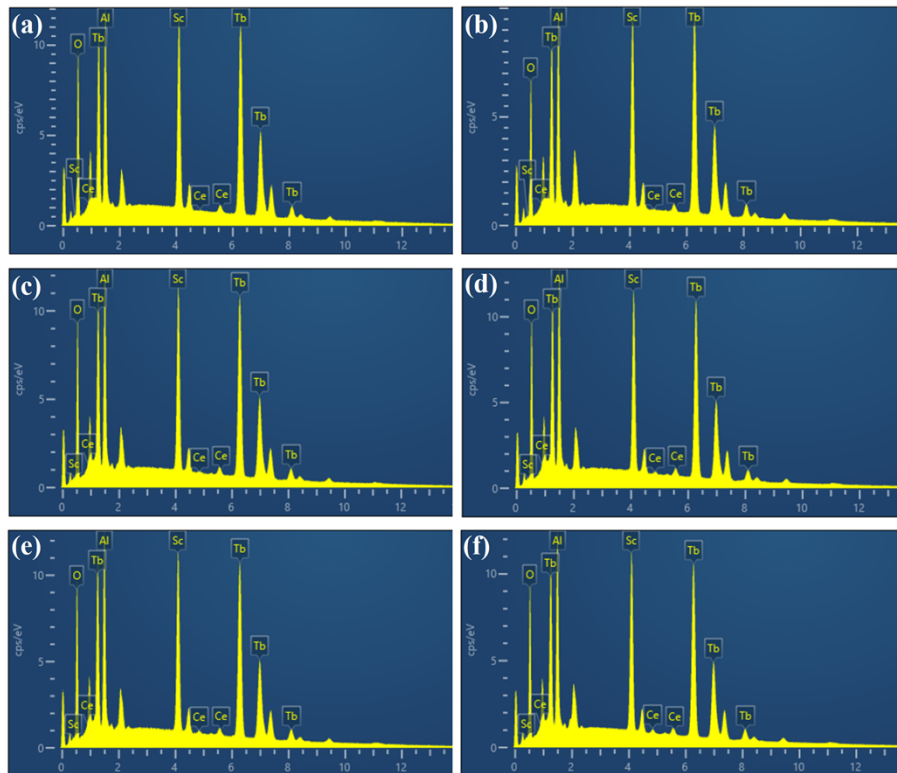

**Figure S18.** EDS elemental spectrum of  $(\text{Tb}_{1-x}\text{Ce}_x)_3\text{Sc}_2\text{Al}_3\text{O}_{12}$  ceramics ( $x=0.001, 0.0025, 0.005, 0.01, 0.015, 0.02$ ).

**Table S1.**

The reliability parameters obtained by XRD Rietveld refinement.

| Materials                 | The reliability parameters |      |
|---------------------------|----------------------------|------|
|                           | Rp                         | Gof  |
| Ce <sub>0.001</sub> TSAG  | 8.88%                      | 1.65 |
| Ce <sub>0.0025</sub> TSAG | 8.67%                      | 1.49 |
| Ce <sub>0.005</sub> TSAG  | 7.11%                      | 1.36 |
| Ce <sub>0.01</sub> TSAG   | 9.56%                      | 1.45 |
| Ce <sub>0.015</sub> TSAG  | 9.46%                      | 1.60 |
| Ce <sub>0.02</sub> TSAG   | 7.94%                      | 1.42 |

**Table S2.**Verdet constants of TGG crystal, TSAG ceramic and (Tb<sub>1-x</sub>Ce<sub>x</sub>)Sc<sub>2</sub>Al<sub>3</sub>O<sub>12</sub> (x=0.001, 0.0025, 0.005, 0.01, 0.015, 0.02) ceramics at different wavelengths.

| Materials                 | Verdet constant (rad·m <sup>-1</sup> ·T <sup>-1</sup> ) at different wavelengths |        |        |        |         |
|---------------------------|----------------------------------------------------------------------------------|--------|--------|--------|---------|
|                           | 405 nm                                                                           | 532 nm | 635nm  | 808 nm | 1064 nm |
| TGG crystal               | -470.2                                                                           | -190.2 | -130.1 | -      | -40.0   |
| TSAG ceramic              | -579.1                                                                           | -226.1 | -150.6 | -92.0  | -47.8   |
| Ce <sub>0.001</sub> TSAG  | -588.4                                                                           | -234.5 | -159.5 | -94.5  | -51.5   |
| Ce <sub>0.0025</sub> TSAG | -582.6                                                                           | -231.4 | -157.9 | -93.2  | -49.9   |
| Ce <sub>0.005</sub> TSAG  | -586.4                                                                           | -236.9 | -162.9 | -94.1  | -51.2   |
| Ce <sub>0.01</sub> TSAG   | -594.2                                                                           | -241.6 | -165.1 | -96.3  | -55.0   |
| Ce <sub>0.015</sub> TSAG  | -585.6                                                                           | -233.8 | -161.9 | -95.0  | -50.9   |
| Ce <sub>0.02</sub> TSAG   | -582.9                                                                           | -230.1 | -153.9 | -92.5  | -48.1   |

**Table S3.**

Proportionality factor  $E$  and transition wavelength  $\lambda_0$  of  $(\text{Tb}_{1-x}\text{Ce}_x)\text{Sc}_2\text{Al}_3\text{O}_{12}$  ( $x=0.001, 0.0025, 0.005, 0.01, 0.015, 0.02$ ) ceramics at room temperature.

---

Fitted equation:  $I/V = I/E (\lambda^2 - \lambda_0^2)$

---

| Materials                 | Proportionality factor $E$ ( $10^3$                     | Transition wavelength $\lambda_0$ (nm) |
|---------------------------|---------------------------------------------------------|----------------------------------------|
|                           | rad·nm <sup>2</sup> ·T <sup>-1</sup> ·m <sup>-1</sup> ) |                                        |
| Ce <sub>0.001</sub> TSAG  | 55286.2                                                 | 245.5                                  |
| Ce <sub>0.0025</sub> TSAG | 53442.2                                                 | 256.4                                  |
| Ce <sub>0.005</sub> TSAG  | 54776.0                                                 | 254.2                                  |
| Ce <sub>0.01</sub> TSAG   | 59234.3                                                 | 218.8                                  |
| Ce <sub>0.015</sub> TSAG  | 54584.0                                                 | 254.8                                  |
| Ce <sub>0.02</sub> TSAG   | 51398.3                                                 | 270.2                                  |

---



**Table S4.**

The temperature-dependent of Verdet constants for the  $\text{Ce}_{0.01}\text{TSAG}$  ceramic at different wavelengths.

| Temperature | Verdet constant ( $\text{rad}\cdot\text{m}^{-1}\cdot\text{T}^{-1}$ ) at different wavelengths |        |        |        |         |
|-------------|-----------------------------------------------------------------------------------------------|--------|--------|--------|---------|
|             | 405 nm                                                                                        | 532 nm | 635nm  | 808 nm | 1064 nm |
| 293 K       | -594.2                                                                                        | -241.6 | -165.1 | -96.3  | -55     |
| 323 K       | -544.4                                                                                        | -226.4 | -152.3 | -87.0  | -51.5   |
| 373 K       | -483.8                                                                                        | -199.2 | -129.0 | -75.0  | -41.0   |
| 423 K       | -429.0                                                                                        | -162.1 | -112.1 | -62.5  | -38.5   |
| 473 K       | -369.1                                                                                        | -141.6 | -98.0  | -57.3  | -32.5   |
| 523 K       | -318.5                                                                                        | -130.7 | -88.3  | -52.4  | -27.6   |
| 573 K       | -280.2                                                                                        | -109.4 | -79.0  | -38.4  | -25.4   |
| 623 K       | -244.6                                                                                        | -100.8 | -72.1  | -42.6  | -24.3   |
| 673 K       | -206.6                                                                                        | -91.5  | -63.0  | -37.3  | -22.8   |

**Table S5.**

Proportionality factor  $E$  and transition wavelength  $\lambda_0$  of the  $\text{Ce}_{0.001}\text{TSAG}$  ceramic at different temperatures.

| $\text{Ce}_{0.001}\text{TSAG}$ | Fitted equation: $I/V = I/E (\lambda^2 - \lambda_0^2)$                                                          |                                        |
|--------------------------------|-----------------------------------------------------------------------------------------------------------------|----------------------------------------|
|                                | Proportionality factor $E$ ( $10^3$<br>$\text{rad} \cdot \text{nm}^2 \cdot \text{T}^{-1} \cdot \text{m}^{-1}$ ) | Transition wavelength $\lambda_0$ (nm) |
| 293 K                          | 59234.3                                                                                                         | 218.8                                  |
| 323 K                          | 50444.2                                                                                                         | 258.0                                  |
| 373 K                          | 44753.1                                                                                                         | 243.1                                  |
| 423 K                          | 39308.5                                                                                                         | 234.6                                  |
| 473 K                          | 34687.8                                                                                                         | 230.4                                  |
| 523 K                          | 30287.0                                                                                                         | 241.8                                  |
| 573 K                          | 27280.7                                                                                                         | 234.7                                  |
| 623 K                          | 25305.7                                                                                                         | 215.8                                  |
| 673 K                          | 23055.7                                                                                                         | 216.3                                  |

**Table S6**

Verdet constants of TSAG ceramics,  $(\text{Tb}_{1-x}\text{Ce}_x)\text{Sc}_2\text{Al}_3\text{O}_{12}$  ( $x=0.001, 0.0025, 0.005, 0.01, 0.015, 0.02$ ) ceramics, TSAG crystals, and TGG crystals at different wavelengths.

| Materials                       | Verdet constant ( $\text{rad}\cdot\text{m}^{-1}\cdot\text{T}^{-1}$ ) at different wavelengths |        |             |        |         |
|---------------------------------|-----------------------------------------------------------------------------------------------|--------|-------------|--------|---------|
|                                 | 405 nm                                                                                        | 532 nm | 635nm       | 808 nm | 1064 nm |
| TSAG ceramic                    | -579.1                                                                                        | -226.1 | -150.6      | -92.0  | -47.8   |
| $\text{Ce}_{0.001}\text{TSAG}$  | -588.4                                                                                        | -234.5 | -159.5      | -94.5  | -51.5   |
| $\text{Ce}_{0.0025}\text{TSAG}$ | -582.6                                                                                        | -231.4 | -157.9      | -93.2  | -49.9   |
| $\text{Ce}_{0.005}\text{TSAG}$  | -586.4                                                                                        | -236.9 | -162.9      | -94.1  | -51.2   |
| $\text{Ce}_{0.01}\text{TSAG}$   | -594.2                                                                                        | -241.6 | -165.1      | -96.3  | -55.0   |
| $\text{Ce}_{0.015}\text{TSAG}$  | -585.6                                                                                        | -233.8 | -161.9      | -95.0  | -50.9   |
| $\text{Ce}_{0.02}\text{TSAG}$   | -582.9                                                                                        | -230.1 | -153.9      | -92.5  | -48.1   |
| TSAG crystal <sup>1</sup>       | -                                                                                             | -218.0 | -152@633 nm | -      | -65.0   |
| TGG crystal                     | -470.2                                                                                        | -190.2 | -130.1      | -      | -40.0   |

## References

- [1] R. Q. Dou, H. T. Zhang, Q. L. Zhang, N. F. Zhuang, W. P. Liu, Y. He, Y. Y. Chen, M. J. Cheng, J. Q. Luo and D. L. Sun, Growth and properties of TSAG and TSLAG magneto-optical crystals with large size, *Opt. Mater.*, 2019, **96**, 109272.
